1 *Applying computer vision to digitised natural history collections for climate change research:*  
2 *temperature-size responses in British butterflies*

3

4 Rebecca J Wilson<sup>1,2\*</sup>, Alexandre Fioravante de Siqueira<sup>3\*</sup>, Stephen J Brooks<sup>2</sup>, Benjamin W  
5 Price<sup>2</sup>, Lea M Simon<sup>1</sup>, Stéfan J van der Walt<sup>3</sup>, Phillip B Fenberg<sup>1,2</sup>

6

7

8 <sup>1</sup>School of Ocean and Earth Sciences

9 University of Southampton

10 Southampton

11 SO14 3ZH

12 UK

13

14 <sup>2</sup>Department of Life Sciences

15 Natural History Museum

16 London

17 SW7 5BD

18 UK

19

20 <sup>3</sup>Berkeley Institute for Data Science

21 University of California

22 Berkeley, CA

23 94720

24 USA

25

26 Corresponding author:

27 Phillip B Fenberg

28 p.b.fenberg@soton.ac.uk

29

30 \* These authors contributed equally to the paper and share joint first-authorship

31

32 Running head: Computer vision and natural history collections

33 ABSTRACT

34

35 1. Natural history collections (NHCs) are invaluable resources for understanding biotic  
36 response to global change. Museums around the world are currently imaging  
37 specimens, capturing specimen data, and making them freely available online. In  
38 parallel to the digitisation effort, there have been great advancements in computer  
39 vision (CV): the computer trained automated recognition/detection, and  
40 measurement of features in digital images. Applying CV to digitised NHCs has the  
41 potential to greatly accelerate the use of NHCs for biotic response to global change  
42 research. In this paper, we apply CV to a very large, digitised collection to test  
43 hypotheses in an established area of biotic response to climate change research:  
44 temperature-size responses.

45 2. We develop a CV pipeline (Mothra) and apply it to the NHM iCollections of British  
46 butterflies (>180,000 specimens). Mothra automatically detects the specimen in the  
47 image, sets the scale, measures wing features (e.g., forewing length), determines the  
48 orientation of the specimen (pinned ventrally or dorsally), and identifies the sex. We  
49 pair these measurements and meta-data with temperature records to test how adult  
50 size varies with temperature during the immature stages of species and to assess  
51 patterns of sexual-size dimorphism across species and families.

52 3. Mothra accurately measures the forewing lengths of butterfly specimens and  
53 compared to manual baseline measurements, Mothra accurately determines sex and  
54 forewing lengths of butterfly specimens. Females are the larger sex in most species  
55 and an increase in adult body size with warm monthly temperatures during the late  
56 larval stages is the most common temperature size response. These results confirm

57           suspected patterns and support hypotheses based on recent studies using a smaller  
58           dataset of manually measured specimens.

59       4. We show that CV can be a powerful tool to efficiently and accurately extract  
60       phenotypic data from a very large collection of digital NHCs. In the future, CV will  
61       become widely applied to digital NHC collections to advance ecological and  
62       evolutionary research and to accelerate the use of NHCs for biotic response to global  
63       change research.

64

65

66   KEYWORDS Butterfly, Computer vision, Climate Change, Deep Learning, digitisation,

67   Lepidoptera, Mothra, Natural History Collections

68

69 1 INTRODUCTION

70

71 The world's natural history collections contain at least two billion specimens (Ariño 2010).  
72 Tens of millions of these specimens (and counting) are making their way out of the halls and  
73 cabinets of natural history museums and into the virtual world as digital images and  
74 specimen data, either through data portals (<https://data.nhm.ac.uk/>) or aggregators (e.g.,  
75 <https://www.gbif.org/>) (Nelson & Ellis 2019). The purpose of this vast effort is two-fold: to  
76 provide a digital copy of these priceless collections and to advance the core research of  
77 museums for understanding the history and biodiversity of the living world. But as the  
78 Anthropocene progresses, digitised natural history collections (NHCs) can also be leveraged  
79 for understanding the biological impacts of global change (Johnson *et al.* 2011; Meineke *et*  
80 *al.* 2019). Not only will the widespread availability of specimen images and data increase the  
81 rate at which scientists can perform this essential research, but the sheer taxonomic, spatial  
82 and temporal scope of digitised NHCs will help provide a more holistic understanding of how  
83 the biosphere has and will respond to global change.

84

85 Digitised NHCs have been used to investigate multiple aspects of biotic response to global  
86 change, including documenting changes in geographic range and biodiversity (Kharouba *et*  
87 *al.* 2019; Ewers-Saucedo *et al.* 2021), phenology (Brooks *et al.* 2017), and body size of  
88 species (Wilson *et al.* 2019; Wonglersak *et al.* 2020). While such studies are incredibly  
89 important, the number of specimens used are often limited due to the time required to  
90 physically measure and record each specimen. For example, until recently, studies  
91 examining change in body size using images must first open images in software, set the  
92 scale, and manually measure body size or its proxies (Fenberg *et al.* 2016). Thus, despite

93 their availability, specimen images still require time-consuming manipulation and manual  
94 measurement - limiting the amount of data available for individual research projects.

95

96 In parallel to mass digitisation efforts by museums, major advancements have been made in  
97 computer vision (CV) technologies. CV is a rapidly developing field in which computers are  
98 trained to recognise, extract and measure information from digital images or video. While  
99 practical applications of CV have been made in several fields, such as object  
100 recognition/detection for medical purposes (e.g., tumor detection; Svoboda 2020) and  
101 ecologists are starting to use CV for biodiversity analyses in the field (Bjerger *et al.* 2021), CV  
102 is only starting to be used for ecology and evolution research.

103

104 Given the rapid advancements in CV technology and its many applications, it is thought that  
105 CV will become an essential tool for ecology and evolutionary biologists (Lürig *et al.* 2021).

106 For example, CV can be used along with molecular data to help identify cryptic species and  
107 other eco-evolutionary questions (Høye *et al.* 2021). Currently however, there are very few  
108 studies showcasing the powerful utility of pairing CV with NHCs for the purposes of climate  
109 change research (Hsiang *et al.* 2019; McAllister *et al.* 2019). In this paper, we apply CV to a  
110 very large, digitised collection to test hypotheses in an established area of biotic response to  
111 climate change research: temperature-size responses (Sheridan & Bickford 2011).

112

### 113 1.1 Temperature-size responses

114

115 Body size is one of the most important traits of an organism due to its correlation with many  
116 aspects of the life history, ecology, and evolution of species. However, climate warming is

117 thought to be causing widespread reduction in body size and is even suggested to be a  
118 “universal” response to warming (Sheridan & Bickford 2011). However, recent studies show  
119 that species can have varying responses (Horne *et al.* 2015; Tseng *et al.* 2018; Wonglersak *et*  
120 *al.* 2020). This is especially true for insects, which, due to their complex and diverse life  
121 cycles, can lead to a variety of temperature-size responses. Each life stage of  
122 holometabolous insects can experience different environmental conditions, which may  
123 cause each stage to respond in a different way to temperature (Kingsolver *et al.* 2011;  
124 Wilson *et al.* 2019). In addition, each sex may have different temperature-size responses,  
125 which may affect the magnitude of sexual size dimorphism (Fenberg *et al.* 2016). Thus, it is  
126 important that life stages, sex, and the environmental conditions experienced by them, are  
127 considered when investigating temperature-size responses.

128

129 Lepidoptera are useful study taxa for examining temperature-size responses as their life  
130 stages are clearly defined, the sexes of many species can be easily identified, and they have  
131 relatively short generation times. If adult body size measurements are paired with  
132 temperature records across multiple generations, years, per sex, and for each immature life  
133 stage (e.g., early to late larval and pupal stages), then it is possible to determine the  
134 direction and strength of adult body size responses to temperature and which factors are  
135 most predictive of observed responses (Bowden *et al.* 2015; Davies 2019).

136

137 NHCs paired with temperature records can provide a useful resource for studying  
138 temperature-size responses because NHCs often span many decades, over which a large  
139 range of inter- and intra-annual (i.e., seasonal) temperature records may be available. In  
140 recent years, the use of NHCs to study temperature-size responses in insects has become

141 common, but responses often vary among taxa (Baar *et al.* 2018; Tseng *et al.* 2018). For  
142 example, the body sizes of Zygoptera (damselflies) are more sensitive to temperature than  
143 Anisoptera (dragonflies) (Wonglersak *et al.* 2020). This suggests that, at least in some insect  
144 groups, phylogenetic relationships are also an important predictor of the direction and  
145 magnitude of temperature-size responses. Butterflies often increase in adult size with  
146 increasing temperature (MacLean *et al.* 2016) and analysis of four UK butterfly species  
147 found that the strongest prediction of adult size was temperature during the late larval  
148 stage (Fenberg *et al.* 2016; Wilson *et al.* 2019). But in order to determine if these are  
149 general responses, more species and specimens need to be analysed.

150

151 Here, we use a newly developed CV pipeline to automatically measure body size attributes  
152 (e.g., wing lengths), orientation (pinned ventrally or dorsally), and identify the sex of  
153 specimens of British butterfly specimens housed at the NHM (n=184,533). We test the  
154 accuracy of the pipeline by comparing the automated results to manual measurements of  
155 30 butterfly species. We also test if there are patterns of sexual size dimorphism (SSD)  
156 across 32 species, testing the hypothesis that females are larger than males (Teder 2014).

157

158 For temperature-size responses, we pair wing-length measurements with monthly  
159 temperature records experienced by the immature stages of 24 species across four families  
160 to determine the direction and strength of responses per species and to look for general  
161 patterns across species. We hypothesise that the adult sizes of univoltine species (and first  
162 generations of bivoltine species) will increase with increasing temperatures during the late  
163 larval stages, and that males and females will respond differently, based on previous work  
164 (Fenberg *et al.* 2016; Wilson *et al.* 2019). These same studies, however, also show that

165 increasing temperatures during the early larval stage causes some species to become  
166 smaller as adults and that response to temperature during the pupal stages varies. We  
167 therefore hypothesise that (i) warmer temperatures during the late larval stages will be  
168 correlated with larger adults, (ii) warmer temperatures during early and pupal stages will  
169 result in variable responses across species, and (iii), sex and family will be important factors  
170 given recent studies (Wilson *et al.* 2019; Wonglersak *et al.* 2020).

171

## 172 1.2 Study system

173

174 The British butterfly specimens housed at the Natural History Museum (London) were  
175 among the first very large scientific collections to be mass digitised. 184,533 specimens  
176 comprising 94 species of butterflies (collected from 1803-2006) have been digitised during  
177 the iCollections project (Paterson *et al.* 2016). Each pinned specimen is imaged with a scale  
178 bar (mm) and associated labels. All specimen data have been extracted and databased for  
179 specimens with sufficient information, which include the geo-referenced location, date of  
180 collection, and collector. We use these data and life history information paired with  
181 historical temperature records in order to test our temperature-size hypotheses.

182

## 183 2 METHODS

184

### 185 2.1 Mothra development

186

187 Mothra is a Python package for analysing images of Lepidoptera specimens, inferring sex  
188 and measuring body size attributes using a combination of deep learning and image



189 processing techniques. It is built on NumPy (Harris *et al.* 2020), SciPy (Virtanen *et al.* 2020),  
190 matplotlib (Hunter 2007), scikit-image (Van der Walt *et al.* 2014), PyTorch (Paszke *et al.*  
191 2019), and fastai (Howard & Gugger 2020). Mothra processes images that include: the  
192 pinned specimen, a scale bar, and several printed or hand-written labels (Fig. 1A). Mothra  
193 identifies these image elements, finds key points on the specimen, makes measurements,  
194 and translates pixel distances to millimetres after interpreting the scale bar. Mothra can be  
195 applied to any images of pinned Lepidoptera specimens if a millimetre scale bar is present  
196 (Fig. 1A) and can be trained to identify other scale bars as needed. While Mothra also works  
197 on many moth species, we focus on butterflies for this paper as they were used to train the  
198 segmentation algorithm.

199

200 To recognize image elements (specimen, scale, and labels), we use a U-Net convolutional  
201 neural network (Ronneberger *et al.* 2015) with ResNet-34 (He *et al.* 2016) in the analysis  
202 path (Zhang *et al.* 2018; Paszke *et al.* 2019; Howard & Gugger 2020). The ResNet-34  
203 implementation from PyTorch is pre-trained on the ImageNet image database (Deng *et al.*  
204 2009). The U-Net is trained using 150 manually segmented images of different Lepidoptera  
205 species. Labels correspond to the three elements (specimen, scale, labels) as well as the  
206 background. Each iteration of training uses a batch of four images, and training completes  
207 after 26 epochs (i.e., after all data has been seen 26 times).

208

209 The network is trained using the 1cycle policy (Smith 2018), whereby learning rates start  
210 low, increase, then drop back to below the initial value. The first epoch only trains the last  
211 U-Net layer (bottom of the "U") with a learning rate of  $2 \times 10^{-3}$  while the rest of the  
212 network is frozen. In subsequent epochs, the entire network is unfrozen. We use a

213 discriminative learning rate (i.e., a different learning rate for each layer; Smith 2018) of  $10^{-5}$   
214 5 for the first layer,  $10^{-3}$  for the last layer, and logarithmically interpolated values for the  
215 middle layers. Training continues for a further 25 epochs.

216

217 The input dataset is augmented by changes in orientation, scale, exposure, and warp. Input  
218 and labelled images were resized from their original size, 5184 x 3456 pixels, to 448 x 448  
219 pixels. After classification, Mothra returns an image with labels corresponding to four  
220 classes: specimen, scale bar (scale), labels, and background (Figure 1B). The central axis of  
221 the specimen is taken as the horizontal centre of gravity. The image is then split into left and  
222 right sides. Wing tips and shoulders are located (Figure 1C) for each side: the wing tip is  
223 defined as the most distant pixel from the centre of the specimen, while the shoulder is  
224 where the upper-central part of the body dips lowest in the vertical direction.

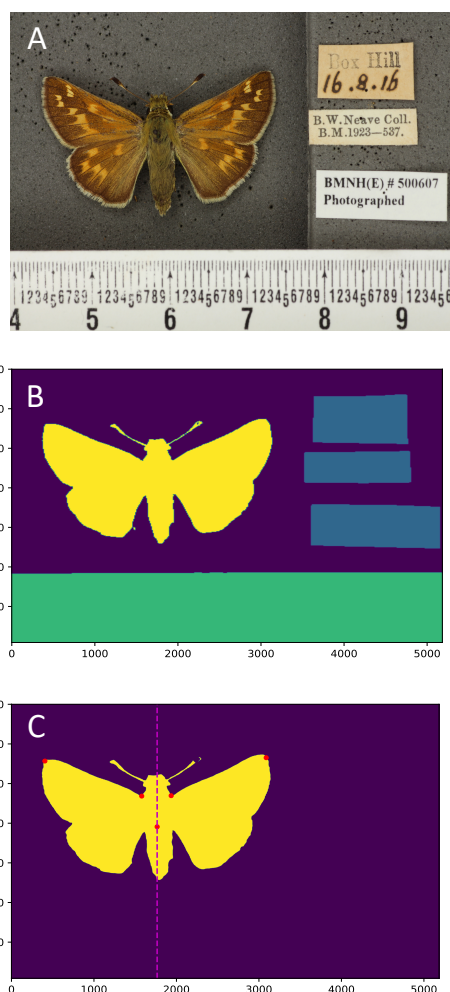

225

226 FIGURE 1. A.) Example input image (female *Hesperia comma*) containing the pinned

227 specimen, a scale bar, and data labels. B.) Image returned by Mothra, containing predictions

228 to the specimen (yellow), scale bar (green), labels (blue), and background (purple). C.) Wing

229 tips, shoulders, and centre (red dots) of the specimen (yellow). These points are used for the

230 measurements of forewing lengths (shoulders to wingtips), wingspan (wingtip to wingtip),

231 centre to wingtips, and shoulder width (shoulder to shoulder). Axis values in B and C are

232 pixel numbers.

233

234 To convert between pixel distances and millimetres, the scale bar is analysed. Its image

235 coordinates are returned by the classification step, after which the scale bar image is

236 extracted and turned into a binary image using an automated Otsu threshold (Otsu 1979).  
237 Numbers are removed by filtering objects on their area and eccentricity, and the image is  
238 then summed vertically to produce a one-dimensional vector of values. Summing across the  
239 scale bar increases robustness against noise. That summation is, in turn, thresholded, since  
240 we are only interested in transition periods, not in amplitudes. A Fast Fourier Transform is  
241 then performed to determine the most dominant frequency. This frequency is given in  
242 pixels per cycle and corresponds to the minor ticks on the scale bar: using it, we can convert  
243 the measurements from pixels to millimetres.

244

245 Next, we want to predict sex and orientation: either the specimen is pinned dorsally (with  
246 the upper surface of the wings shown), or ventrally (with the underside of the wings  
247 shown). For that purpose, we trained a ResNet-50 network using 2986 images separated  
248 into three classes: 1549 pinned ventrally (where we did not classify sex), 722 male, and 715  
249 female (both latter classes being pinned dorsally). Training images were resampled to 256 x  
250 256 pixels, and data augmentation was performed using the Albumentations library  
251 (Buslaev *et al.* 2020) which adds random changes of hue, saturation, and value in the  
252 interval (-0.2, 0.2), as well as coarse dropout of rectangular regions in the image (DeVries &  
253 Taylor 2017). Each augmentation was applied with a probability of 0.5 per generated  
254 augmented sample.

255

256 Mothra, the collection of algorithms and functions implemented for this study, is  
257 permissively licensed under the BSD-3 clause license and available on GitHub (Mothra Team,  
258 2021). Mothra automatically downloads the latest pre-trained version of the neural  
259 network. The data accompanying this study, including networks trained and images used in

260 training, are available on GitLab (Mothra Team, 2020). The images we used are part of the  
261 iCollections project, released under the CC-BY license (Wilson *et al.*, 2020).  
262  
263 For each analysis Mothra takes an input folder of images or a text file listing the location of  
264 the input images, and then outputs the following data as a CSV file: length (mm) of each  
265 forewing, distance from each wing tip to the centre of the specimen (mm), wingspan from  
266 wing tip to wing tip (mm), shoulder width between shoulders (mm), pinned orientation, and  
267 sex. For each image an output image can be provided with the measurements overlaid (Fig.  
268 2).

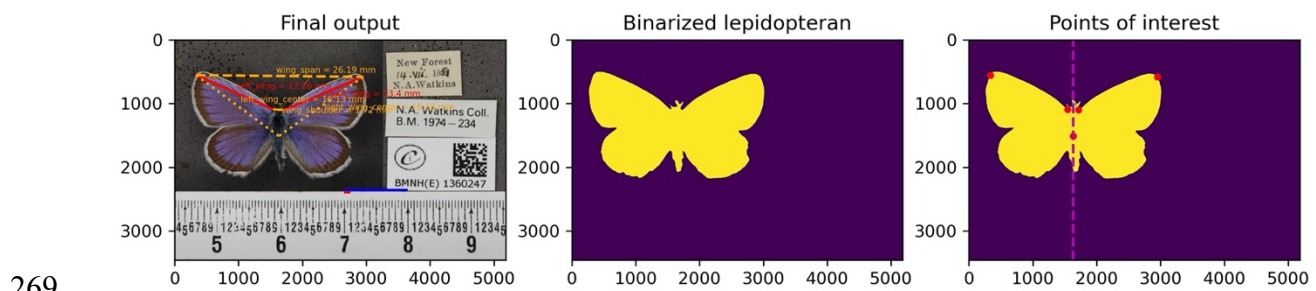

270 FIGURE 2. Example Mothra output image (male *Plebejus argus*) with the final output  
271 showing the measurements overlaid on the image, the binarized specimen, and the points  
272 of interest.

273

## 274 2.2 Mothra testing: manual versus automated measurements and sex ID

275

276 We manually measured the forewing lengths of 3,145 specimens of 30 species across four  
277 families using ImageJ software. Measurements of four species are from previously published  
278 research by the co-authors (Fenberg *et al.* 2016; Wilson *et al.* 2019). We then measured the  
279 same specimens using Mothra. For each specimen, we calculated the average between the  
280 left and right forewing lengths for both the manual and Mothra measurements. We then  
281 compared the correlation between measurements across all specimens; testing if the slope  
282 is equal to 1 (i.e., a one-to-one correlation). We also performed t-tests of measurements  
283 grouped per family to test if the manual versus automated measurements are statistically  
284 different. We categorised specimens by sex for species in which the sexes are reliably  
285 detectable by eye from images (n=20 species; 2,807 specimens). A further 5,127 specimens  
286 were identified to sex by Wilson (2021). We then compared the sex IDs for all specimens  
287 combined (n=8,272 specimens from 20 species) to the Mothra outputs to determine the  
288 accuracy of the automated sex identifications.

289

## 290 2.3 Mothra measurements of the iCollections

291

292 Once we determined the accuracy of the automated wing-length measurements and sex  
293 identification (see below), we ran Mothra on all butterfly specimens within the iCollections  
294 dataset (Paterson *et al.* 2016) using the NHM HPC cluster. This dataset constitutes 184,533  
295 specimens. For analysis purposes, we only focus on the four main families that constitute  
296 99% of the collections (Hesperiidae, Lycaenidae, Nymphalidae, Pieridae) and removed

297 species (n=32) which have either very few specimens (<100) or are not native to Britain  
298 (e.g., rare occurrences). Ventrally pinned specimens (n=51,646) were removed to keep  
299 forewing length measurements and sex identification consistent. Measurements of forewing  
300 length for 130,173 specimens across 60 species and four families were analysed. For each  
301 species, we removed any specimens in which the absolute value difference between the  
302 right and left forewing lengths were larger than 2mm in order to remove any specimens  
303 with wing damage. We also removed specimens for which the Mothra measurements were  
304 clearly incorrect (e.g., measurements that were too large or small given the size of the  
305 species) by examining the output images for the biggest outliers. We also checked the  
306 remaining output images for the largest and smallest individuals per species to determine if  
307 they were incorrect measurements. In total, only 1.8% of specimens were removed as clear  
308 outliers/incorrect measurements (n=2,360), leaving 127,813 specimens for analysis (SI Table  
309 2). For species which we trained Mothra for sex identification, we tested the hypothesis that  
310 females are, on average, larger than males and looked for patterns across families.

311

#### 312 2.4 Temperature-size responses: individual species analysis

313

314 We analysed a subset of the Mothra measurements for temperature-size responses (24  
315 species). These species were chosen as they have good meta-data, are representative of  
316 each family, and have varying life histories and habitat requirements. We only included  
317 specimens if there was a known year, location, and month of collection, and collected on  
318 the island of Great Britain. Where applicable, we separated specimens into generations (see  
319 Wilson *et al.* 2019). If a species had a partial second generation, or a variable number of  
320 generations from year to year, specimens were removed to keep the number of generations

321 per year consistent. For example, *Aglais urticae* has one generation in Scotland and two  
322 generations a year in other parts of the UK, so Scottish specimens were removed.  
323 Additionally, we removed specimens with collection dates outside the expected range of  
324 adult flight season for that species, based on Thomas & Lewington (2014). We did not  
325 include specimens of a species if there were fewer than three specimens available per year  
326 (and sex where applicable). We used information about the life cycles of each species given  
327 in Thomas & Lewington (2014) to determine which monthly temperatures were appropriate  
328 for analyses. We used temperatures from months when species were in the early larval, late  
329 larval and pupal stages; winter months were not used as growth would be limited. We used  
330 mean monthly temperature data from the Central England Temperature Record for all  
331 analyses (<https://www.metoffice.gov.uk/hadobs/hadcet/>).

332

333 Following Fenberg *et al.* (2016) and Wilson *et al.* (2019), we compared average forewing  
334 length to average monthly temperatures using multiple linear regression analyses to  
335 determine if temperatures experienced during the immature stages affect adult size. We  
336 used R statistical packages MASS and MuMIn to run stepwise regression in both directions  
337 to select variables for the final model and information theoretic (IT) model selection with  
338 model averaging based on Akaike Information Criterion (AIC). Where applicable, we ran  
339 separate models for each sex and generation.

340

341 A total of 17,727 specimens and 24 species are in the final analysis. In 15 species, males and  
342 females could be identified, and three species had two generations that could be analysed  
343 separately, giving a total of 44 models. For each species with a significant model, we  
344 calculated the percentage change in adult size per °C for the most significant month in early



345 larval, late larval and pupal stages. Where there was not a significant variable for a  
346 particular life stage, the most important non-significant variable was used. We calculated  
347 percentage changes from slopes of the natural log of average forewing length versus  
348 temperature:  $((\exp(\text{slope})-1) \times 100)$ .

349

350 2.5 Temperature-size responses: multi-species analysis

351

352 We compiled data to look for general patterns of temperature-size responses across  
353 species. Firstly, we compiled the percentage change in adult size per °C of the three  
354 immature stages for each species and, where applicable, each sex and generation. Secondly,  
355 we compiled the natural log of average forewing lengths for all specimens used in the  
356 individual species analyses. Natural logs were used to allow for species of different sizes to  
357 be compared without the effects of scaling. We used temperature data from the most  
358 important month for predicting adult size during each immature stage for the multi-species  
359 analyses. We also included four other variables (family, habitat, size category, overwintering  
360 stage) in the form of multi-level factors (SI Table 1) to determine which may affect the  
361 strength and direction of temperature-size responses. We selected these four factor  
362 variables a priori as likely having an influence on temperature-size response based on  
363 previous research (Fenberg *et al.* 2016; Tseng *et al.* 2018; Davies 2019; Wilson *et al.* 2019).

364

365 We compared percentage change in adult size per °C increase in temperature during each  
366 immature stage between the four factor variables (SI Table 1). We performed linear mixed  
367 effects models using the natural log of average forewing lengths of specimens from all 24  
368 species, with temperature during the early larval, late larval and pupal stages as fixed effects

369 and the random effects of family, overwintering stage, habitat and size category in each  
370 model. ANOVAs and AIC values were used to determine which model gave the best fit. We  
371 repeated analyses for species where sex could be determined, with sex included as a  
372 random factor.

373

### 374 3 RESULTS

375

#### 376 3.1 Automated versus manual measurements and sex ID

377

378 The Mothra measurements are nearly identical to the manual measurements (Fig. 3). The  
379 correlation between average forewing length of the Mothra versus manual measurements is  
380 0.98 and the slope is 1.0. After 6 clear outliers were removed, the correlation is 0.99 with a  
381 slope of 1.03. These results indicate that there is a nearly perfect one-to-one relationship  
382 between the Mothra and manual measurements. For all specimens combined, there is no  
383 difference between measurements (t test,  $P=0.33$ ). When grouped by family, manual versus  
384 Mothra measurements are not statistically different except for HesperIIDae, where there is a  
385 slight difference ( $P<0.001$ ) in mean forewing length between manual (13.34 mm) and  
386 Mothra measurements (13.12 mm). These differences are driven by *Hesperia comma*, due  
387 to a consistent difference in where the wingtip was manually located by (Fenberg *et al.*  
388 2016).

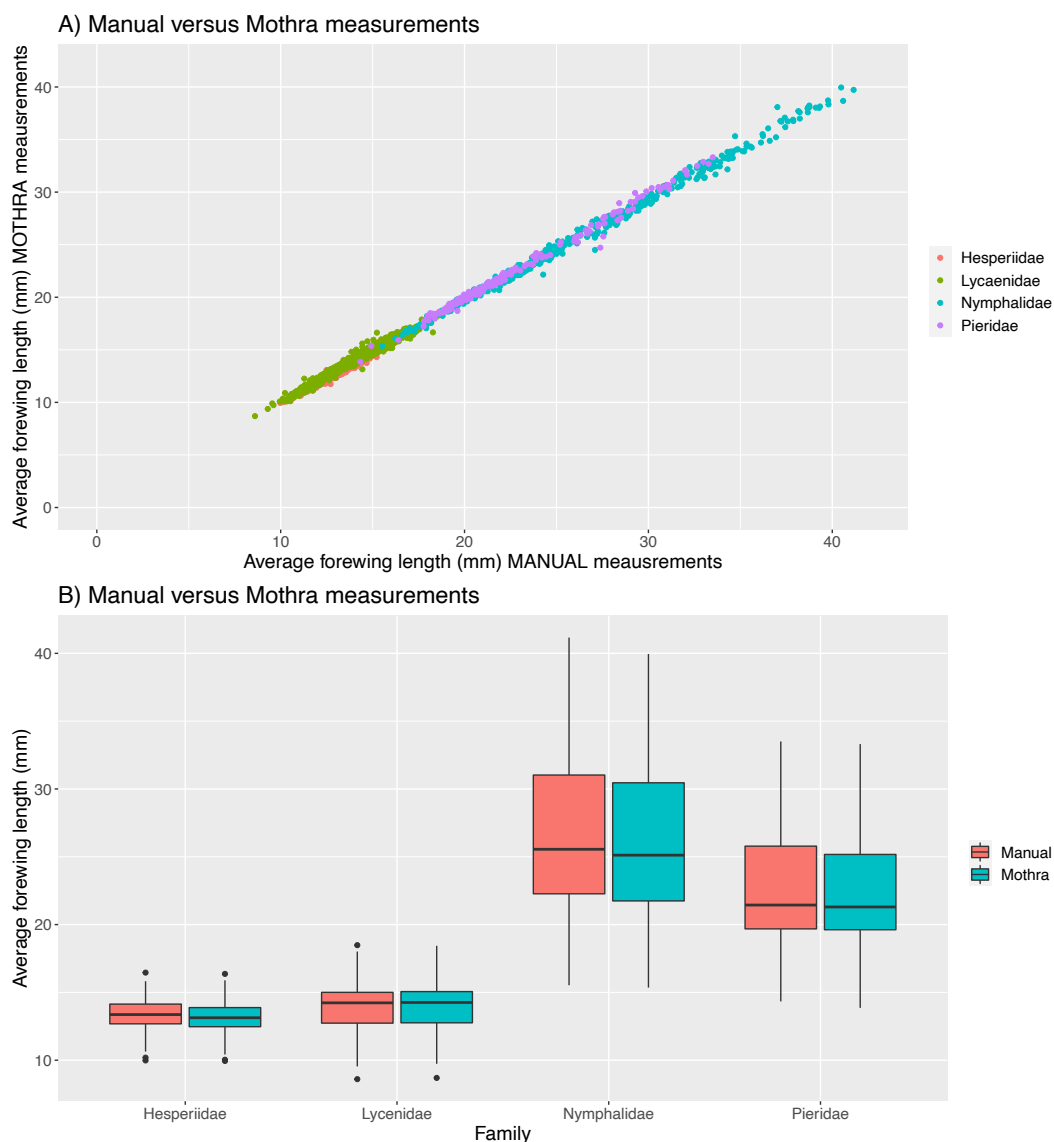

389  
390 FIGURE 3. A.) Correlation between Mothra versus manual measurements for 3,145  
391 specimens across 30 species from four families. Pearson's correlation  $R = 0.99$  and the slope  
392 = 1.03, revealing a nearly one to one relationship between manual and automated  
393 measurements. B.) Boxplots comparing the manual versus automated measurements  
394 grouped by family. Except for Heperiidae (see main text), there are no significant differences  
395 between the two measurements. Six outliers were removed from these figures due to  
396 incorrect Mothra measurements (see main text).

397 The sex identifications for species in which the sexes are reliably detectable by eye (n=20)  
398 were highly accurate. Out of 5,127 specimens, only 2.9% (n=149 specimens) were different  
399 between the manual versus Mothra identifications. After inspection of a subset specimens  
400 that have a discrepancy in sex ID (n=41 specimens), it was noted that 17 specimens were  
401 mis-identified by eye and 9 were misidentified by Mothra, the remaining 24 specimens were  
402 discoloured or gynandromorphs where sex ID is not possible.

403

### 404 3.2 Size distribution and patterns of sexual size dimorphism

405

406 Given the accuracy of the wing length measurements and the sex identifications, we felt  
407 confident to run Mothra on all specimens in the iCollections dataset (all results available  
408 here: <https://doi.org/10.5281/zenodo.5759759> [embargoed until publication]; Price and  
409 Fenberg 2021). The number of inaccurate measurements (either damaged specimens or  
410 incorrect Mothra measurements) removed from the dataset was very small (1.8% of  
411 specimens, see above), with the resulting size distributions per species seen in Figure 4. As  
412 an initial test of the utility of this massive dataset, we tested the hypothesis that females are  
413 larger than males per species (as is the case for many insect species, largely due to their  
414 longer developmental times (Teder 2014). Our results show that this is broadly true for  
415 British butterflies (Fig. 5). Out of 32 species, 30 have significant SSD, but males are the larger  
416 sex in only seven species (five are in Lycaenidae and two in Pieridae; SI Table 2). Four of the  
417 Lycaenidae are in the subfamily Polyommatainae (i.e., the blues). For the remaining species  
418 (n=23), the females are the larger sex, including all species in HesperIIDae and Nymphalidae.

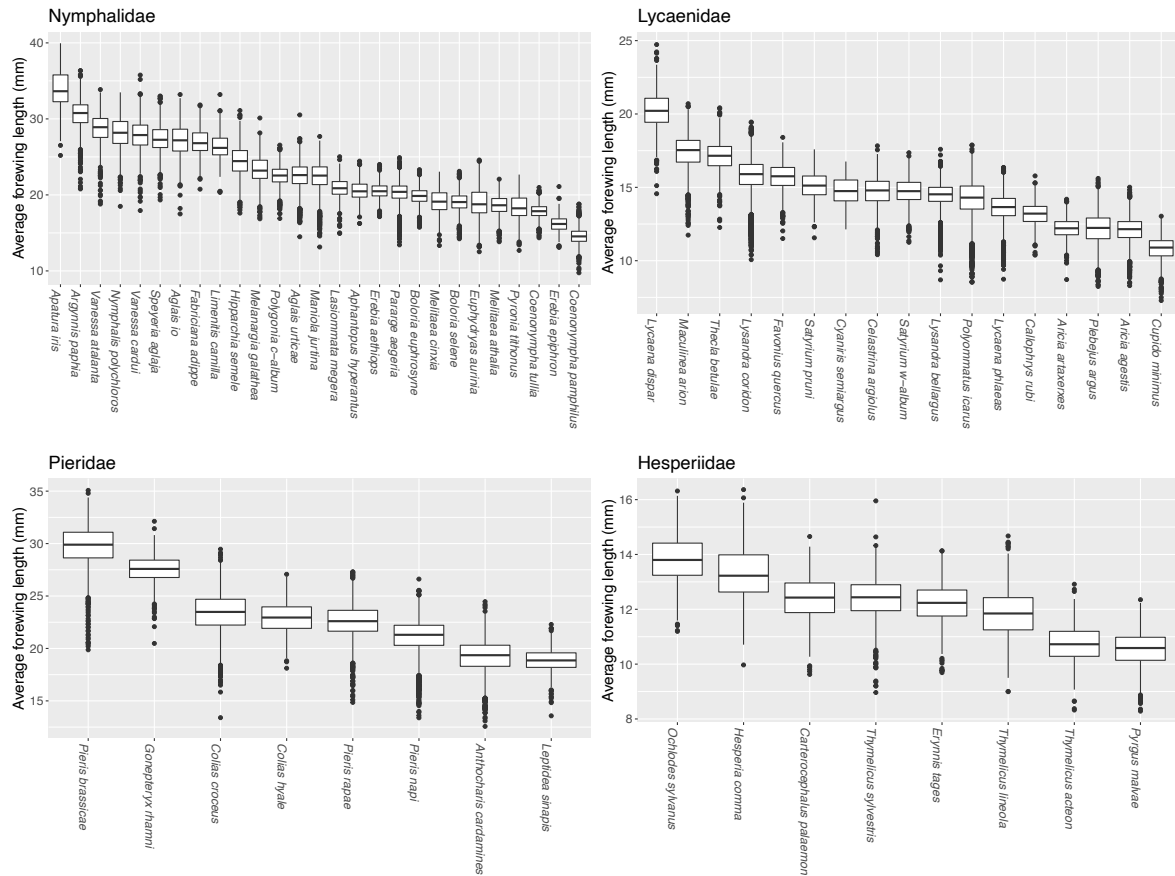

419

420 FIGURE 4. Size-distributions of the Mothra measurements of the dorsally pinned specimens

421 for each species in the iCollections native to the island of Great Britain from the four main

422 families (60 species). This figure represents measurements from a total of 127,813

423 specimens, excluding faulty measurements and damaged specimens (n=2,360 specimens).

424

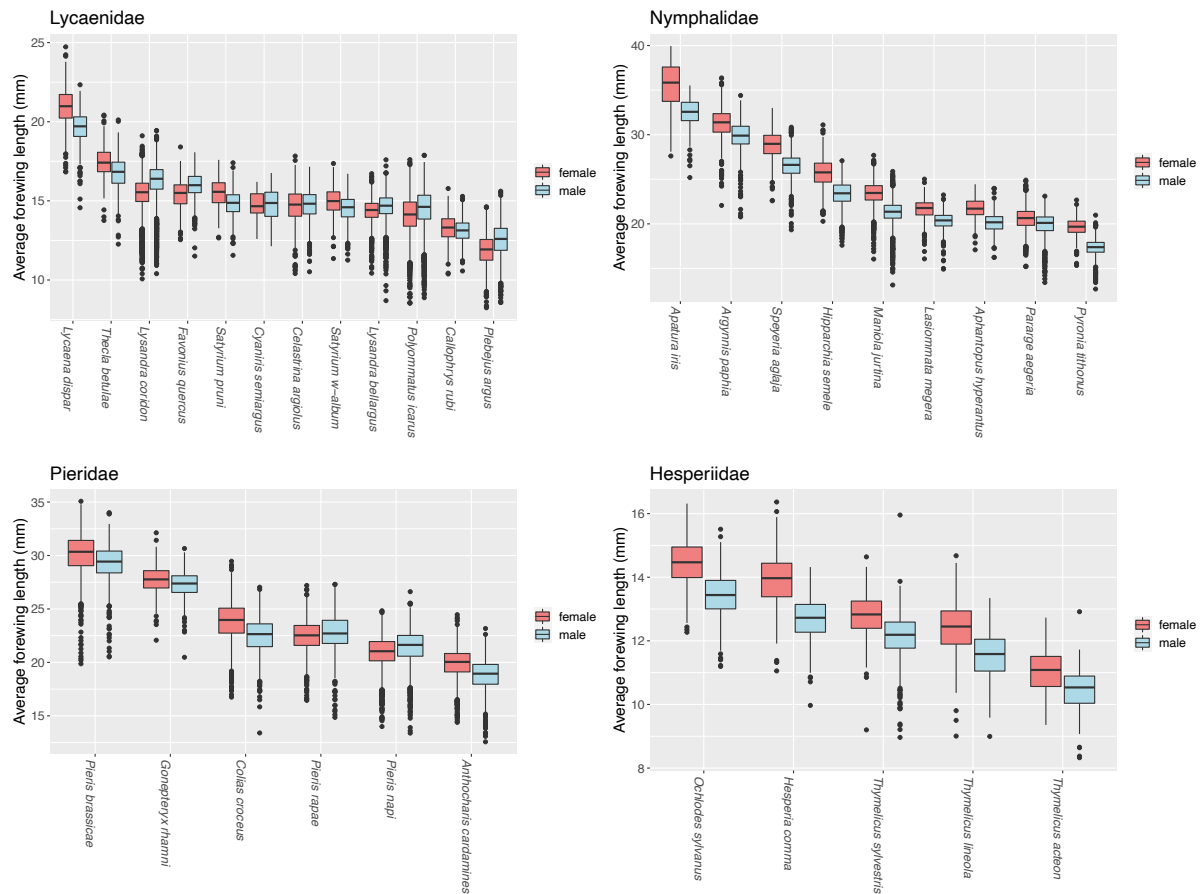

425

426 FIGURE 5. Size distributions of the Mothra measurements for each species trained for sex

427 identification (n=32 species). Most species (n=23) have female biased sexual size

428 dimorphism (including all species in Hesperidae and Nymphalidae). Seven species have

429 male biased sexual size dimorphism (five species in Lycaenidae and two species in Pieridae)

430 and two species do not have sexual size-dimorphism.

431

### 432 3.3 Temperature-size responses: individual species analysis

433

434 When average forewing lengths were compared to monthly temperatures using multiple

435 linear regression models, 20 of the 44 models were significant. This accounted for 17 of the

436 24 species analysed. In all but four of the significant models, an increase in adult size with

437 increasing temperature during the late larval stage was significant. The responses of adult

438 size to temperatures experienced during the early larval and pupal stages were less

439 consistent. Only eight of the 20 models had a significant change in adult size in relation to

440 changes in temperature during the early larval stage and eight models had significant

441 changes in adult size in the pupal stage, with both having a mix of increases and decreases

442 in size with increasing temperatures. The percentage changes in adult size per increase in °C

443 during each immature stage are given in SI Table 5, and detailed individual model results are

444 in the supplementary information (SI tables 3 and 4).

445

### 446 3.4 Temperature-size responses: multi-species analysis

447

448 The influence of temperature during the immature stages on adult size for each species

449 were compared in two ways: using percentage change in size from all species and using only

450 those with significant individual models (SI Table 5). There was little difference in the results

451 between the two methods and, therefore, the results presented here are for species with

452 significant models only. There was no significant difference in the mean percentage change

453 in adult size between species in different size categories or between species that

454 overwintered in different life history stages ( $p > 0.05$ ). There were no significant differences

455 in mean percentage change in adult size between species occurring in different habitat  
456 types for the early and late larval stages, but there was for the pupal stage ( $F=3.649$ ,  $df=3$   
457 and 14,  $p=0.0392$ ), with a difference between those in a woodland habitat and those in  
458 grassland habitats ( $p=0.0477$ ).

459

460 There was a significant difference in percentage change in adult size according to the three  
461 developmental stages for species with significant individual models ( $F=12.21$ ,  $df=2$  and 55,  
462  $p<0.001$ ), with differences between percentage changes per °C in the late larval stage and  
463 both the early larval and pupal stages ( $p<0.01$ ; Fig. 6). On average, forewing length  
464 increased by 0.69% per °C increase in temperature during the late larval stage ( $SE=0.13$ ),  
465 decreased by 0.29% per °C in the early larval stage ( $SE=0.14$ ), and decreased by 0.02% per °C  
466 in the pupal stage ( $SE=0.17$ ). Additionally, there were significant differences in percentage  
467 change in adult size per °C temperature increase in the early larval stage between species  
468 from different families ( $F=15.74$ ,  $df=3$  and 16,  $p<0.001$ ), with differences between the  
469 Hesperidae and all other families, and the Lycaenidae and the Nymphalidae ( $p<0.05$ ). On  
470 average, there was a 0.39% increase in average forewing length per °C temperature increase  
471 in the early larval stage for the Hesperidae, a 0.99% decrease in size per °C for the  
472 Lycaenidae, and a 0.28% decrease in size per °C in the Nymphalidae (Fig. 6). A two-way  
473 ANOVA to test for differences in percentage changes in adult size between stages and  
474 families also found a significant interaction between life stage and family ( $F=3.004$ ,  $df=6$  and  
475 46,  $p=0.0146$ ). There is a large difference in responses to temperatures between larval  
476 stages for the Lycaenidae (Fig. 6); on average, there is a large increase in adult size per °C  
477 temperature increase in the late larval stage (0.99%), but a large decrease in adult size per  
478 °C in the early larval stage (-0.99%).



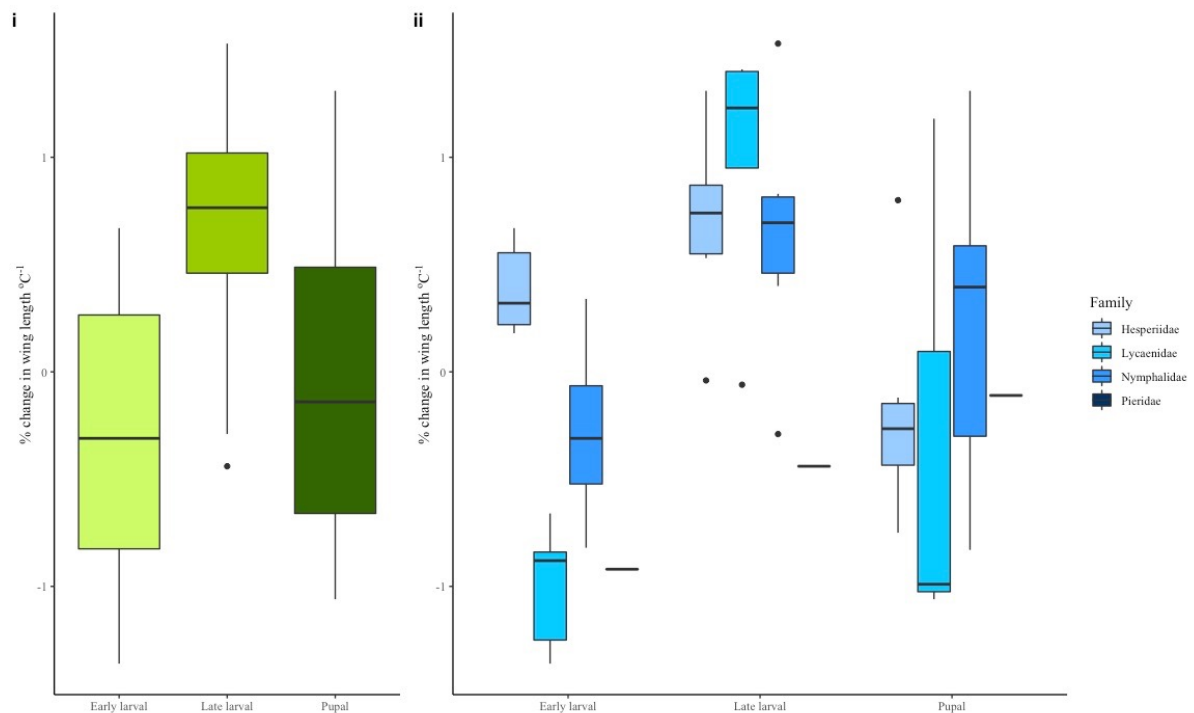

479

480 FIGURE 6. Boxplots of percentage change in adult size per °C change during (i) the early  
481 larval, late larval and pupal stages and (ii) for species grouped by family within each stage.

482 NB: There is only one species of Pieridae with a significant response (*Pieris napi*).

483

484

485 For the linear mixed effects models, various models were tested using combinations of  
486 factors for the fixed effects, starting with a simple model and becoming more complicated.

487 Family was given priority in selection of factors as the above analyses showed there were  
488 significant differences in responses between families. The model with the lowest AIC value

489 was Average forewing length (Ln) ~ Early larval temperature + Late larval temperature +

490 Pupal temperature + (1|Family) (AIC=-20579). For the species where sex could be

491 determined, the model which was most significant was Average forewing length (Ln) ~ Early

492 larval temperature + Late larval temperature + Pupal temperature + (1|Sex) + (1|Family)

493 (AIC=-15324). In both models (for all species and those which can be sexed), family

494 explained the highest proportion of variance in the results (SI Table 6).

495

496 4 DISCUSSION

497

498 The huge effort currently underway to digitise natural history collections (NHCs) will make  
499 museum specimens and their associated collecting data accessible to scientists all over the  
500 globe. A major reason for this mass digitisation effort is to accelerate their usage for global  
501 change research (Hedrick *et al.* 2020). There is now an increasing need for ecologists and  
502 museum scientists to collaborate with computer vision (CV) scientists in order to help make  
503 sense of these massive datasets. Our study is among the first to show that CV can accurately  
504 measure phenotypic data from very large digitised NHC datasets in order to test biotic  
505 response to climate change hypotheses.

506

507 We show that Mothra accurately measures multiple phenotypic aspects of butterfly  
508 specimens (Figs. 1-3). It can also tell whether a specimen is pinned ventrally or dorsally, and  
509 its sex (for species where sexes are detectable by eye). While each of these attributes can be  
510 measured manually from images, the time involved would be immense: manual  
511 measurements of all imaged butterfly specimens (n=184,533) by a single person would take  
512 >3,000 hours (or ~2 years, assuming regular working hours, and only forewing length  
513 measurements). Using Mothra, we were able to run all specimens in under one week by  
514 performing 10 analyses in parallel on a computer cluster, and could have reduced the time  
515 further by running more analyses in parallel (e.g., 50 analyses in parallel would have  
516 reduced the time to a mere 30 hours and remained within the capacity of the current NHM  
517 cluster: 96 CPUs, 2TB RAM, Centos 7 OS).

518

519 CV applied to digitised NHCs will become a common tool in ecology and evolution research  
520 (Lürig *et al.* 2021). CV will help scientists uncover unknown aspects of the biology and  
521 morphology of species, but also to confirm/test hypotheses or suspected patterns based on  
522 previous research using manual measurements. For example, we test hypotheses that were  
523 formulated based on recent studies on temperature-size responses using manual  
524 measurements (Fenberg *et al.* 2016; Wilson *et al.* 2019). For most species with a significant  
525 temperature-size response (14/17), adult size increases with increasing temperature during  
526 the late larval stage (Fig. 6), which is consistent with these studies. While some species did  
527 not show this response, there were no species, sexes or generations that showed the  
528 reverse response. This pattern, while suspected, is now clearer thanks to the application of  
529 CV to many more specimens and species. We suggest that this is because a higher volume  
530 and/or quality of food is available during years with warmer temperatures during the late  
531 larval stages. Therefore, late larval stage individuals can reach optimum growth rates when  
532 food quality and quantity are plentiful, resulting in larger adults (Suhling *et al.* 2015).  
533 However, the optimum temperature for growth and the highest rate of growth will vary  
534 between species, sexes, and generations.

535

536 As expected, different generations did not respond in the same way to temperature (Wilson  
537 *et al.* 2019). For the three bivoltine species, each responded in the first generation but not  
538 in the second (*P. bellargus*, *A. urticae*, and *P. napi*). The different responses between  
539 generations were expected as the larvae of each generation experience different  
540 environmental conditions, which can affect adult body size (Horne *et al.* 2017). In addition,  
541 different temperature-size responses between the sexes can also occur (Fenberg *et al.* 2016;  
542 Wilson *et al.* 2019). Of the 15 species in which the sexes were analysed separately, males

543 had a significant temperature-size response in eight species and females responded in five  
544 species (three species had a significant response in both sexes), and there was no response  
545 from either sex for five species. In all but one of the species with significant results, the  
546 responses to temperature differed between males and females (i.e., the significance or  
547 direction of the temperature response was different in at least one developmental stage).

548

549 In the multi-species analyses, family explained the highest proportion of variance. Although  
550 significant responses to temperature in the late larval stage were always positive, the  
551 magnitude was greatest for Lycaenidae (Fig. 6). The response to early larval stage  
552 temperatures shows the clearest differences between families: all Hesperidae species with  
553 significant models showed an increase in adult size with increasing temperature and  
554 Lycaenidae species showing a decrease in adult size with increasing temperature.

555 Meanwhile, the species analysed within the Pieridae showed very little response; the only  
556 significant response was a decrease in adult size of generation one male *P. napi* with  
557 increasing temperature in the early larval stage. Overall, the Lycaenidae show the largest  
558 variation in responses to temperature between the immature stages, with a large increase  
559 in adult size (0.99% per °C on average) with increasing temperatures in the late larval stage  
560 and a large decrease in adult size (-0.99% per °C on average) with increasing temperature in  
561 the early larval stage. In the pupal stage, there was a range of positive and negative  
562 responses within each family. There are also some differences in response between species  
563 from different habitat types, particularly to temperature during the pupal stage, which may  
564 be due to differences in the microclimates within the habitats experienced by each stage (SI  
565 Fig. 1).

566

567 We also can now confirm that females are the larger sex for most species of British  
568 butterflies. While this is not particularly surprising given that female biased sexual-size  
569 dimorphism (SSD) is commonly reported across insect species (Teder 2014), our study  
570 represents the largest test of this phenomenon in terms of sample sizes. All species of  
571 HesperIIDae and Nymphalidae have female biased SSD, but at least five species of  
572 Lycaenidae and two species of Pieridae have male biased SSD (Fig. 5). Interestingly, four of  
573 the Lycaenidae species with male biased SSD are in the subfamily Polyommatainae. In these  
574 species, there is also a strong colour dimorphism between the sexes. While the reason some  
575 species of this subfamily have male biased SSD requires more research, we can make some  
576 inferences based on their natural history. In most species of insects, the males emerge  
577 earlier than females, termed protandry (Teder *et al.* 2021). In Polyommatainae, males  
578 actively compete and swarm upon freshly emerged females to mate (e.g., in *P. bellargus*;  
579 Thomas & Lewington 2014). Larger males may therefore be at a competitive advantage and  
580 promote male biased SSD. While the causes of SSD in insects is an ongoing debate and are  
581 likely to vary among taxa, our research shows that the direction and strength of  
582 temperature-size responses often varies by sex. Thus, the magnitude of SSD may increase,  
583 decrease, or stay the same with increasing temperature.

584

585 Clearly, temperature size responses in insects are a complex interaction between many  
586 different ecological, geographic, environmental, life history, evolutionary, and historical  
587 variables. While the use of natural history collections can give us valuable clues to how  
588 temperature affects size, and CV can greatly accelerate data collection and analysis, there  
589 will always be a need to conduct field, laboratory, and long-term monitoring studies to  
590 better understand the complexities of how insects will respond to climate change.

591

592 **Acknowledgements**

593

594 We thank the iCollections team (NHM) for capturing the images and data, Paul Ward (NHM)  
595 for providing server access to the images, Robert Foster (NHM) for access to and training on  
596 the HPC cluster, and James Durrant for developing an early wing measurement prototype.

597 We thank Gary Fisher, Graham Wilson and Hannah O'Sullivan for their help with the image  
598 analysis, and Dennis Feng, Sera Yang, Teddy Tran and Théo Bodrito for their work on

599 preliminary versions of Mothra. This work was supported by the Natural Environmental

600 Research Council (grant number NE/L002531/1), and in part by the Gordon and Betty Moore

601 Foundation (Grant GBMF3834) and by the Alfred P. Sloan Foundation (Grant 2013-10-27) to

602 the University of California, Berkeley.

603

604

605 **Author Contributions**

606 PBF, RJW, BWP, and SJB conceived of the ideas for the paper. AdS and SvdW developed

607 Mothra and wrote the accompanying methods section. BWP and PBF analysed the Mothra

608 outputs. LS and RJW performed manual measurements. RJW performed all temperature size

609 analyses. RJW and PBF wrote most of the paper with helpful comments and edits from all

610 co-authors.

611

612 Data availability statement: all data will be archived on Zenodo

613 REFERENCES

- 614 Ariño, A.H. (2010) Approaches to estimating the universe of natural history collections data.  
615 *Biodiversity Informatics*, **7**, 81-92.
- 616 Baar, Y., Friedman, A.L.L., Meiri, S. & Scharf, I. (2018) Little effect of climate change on body  
617 size of herbivorous beetles. *Insect Science*, **25**, 309-316.
- 618 Bjerge, K., Nielsen, J.B., Sepstrup, M.V., Helsing-Nielsen, F. & Høye, T.T. (2021) An  
619 automated light trap to monitor moths (Lepidoptera) using computer vision-based  
620 tracking and deep learning. *Sensors*, **21**, 343.
- 621 Bowden, J.J., Eskildsen, A., Hansen, R.R., Olsen, K., Kurle, C.M. & Høye, T.T. (2015) High-  
622 Arctic butterflies become smaller with rising temperatures. *Biology Letters*, **11**,  
623 20150574.
- 624 Brooks, S.J., Self, A., Powney, G.D., Pearse, W.D., Penn, M. & Paterson, G.L. (2017) The  
625 influence of life history traits on the phenological response of British butterflies to  
626 climate variability since the late-19th century. *Ecography*, **40**, 1152-1165.
- 627 Buslaev, A., Iglovikov, V.I., Khvedchenya, E., Parinov, A., Druzhinin, M. & Kalinin, A.A. (2020)  
628 Albumentations: fast and flexible image augmentations. *Information*, **11**, 125.
- 629 Davies, W.J. (2019) Multiple temperature effects on phenology and body size in wild  
630 butterflies predict a complex response to climate change. *Ecology*, **100**, e02612.
- 631 Deng, J., Dong, W., Socher, R., Li, L.-J., Li, K. & Fei-Fei, L. (2009) Imagenet: A large-scale  
632 hierarchical image database. *2009 IEEE conference on computer vision and pattern  
633 recognition*, pp. 248-255. Ieee.
- 634 DeVries, T. & Taylor, G.W. (2017) Improved regularization of convolutional neural networks  
635 with cutout. *arXiv preprint arXiv:1708.04552*.
- 636 Ewers-Saucedo, C., Allspach, A., Barilaro, C., Bick, A., Brandt, A., Fiege, D., Fütting, S.,  
637 Hausdorf, B., Hayer, S. & Husemann, M. (2021) Natural history collections  
638 recapitulate 200 years of faunal change. *Royal Society open science*, **8**, 201983.
- 639 Fenberg, P.B., Self, A., Stewart, J.R., Wilson, R.J. & Brooks, S.J. (2016) Exploring the universal  
640 ecological responses to climate change in a univoltine butterfly. *Journal of Animal  
641 Ecology*, **85**, 739-748.
- 642 Harris, C.R., Millman, K.J., van der Walt, S.J., Gommers, R., Virtanen, P., Cournapeau, D.,  
643 Wieser, E., Taylor, J., Berg, S. & Smith, N.J. (2020) Array programming with NumPy.  
644 *Nature*, **585**, 357-362.
- 645 He, K., Zhang, X., Ren, S. & Sun, J. (2016) Deep residual learning for image recognition.  
646 *Proceedings of the IEEE conference on computer vision and pattern recognition*, pp.  
647 770-778.
- 648 Hedrick, B.P., Heberling, J.M., Meineke, E.K., Turner, K.G., Grassa, C.J., Park, D.S., Kennedy,  
649 J., Clarke, J.A., Cook, J.A. & Blackburn, D.C. (2020) Digitization and the future of  
650 natural history collections. *BioScience*, **70**, 243-251.
- 651 Horne, C.R., Hirst, A.G. & Atkinson, D. (2015) Temperature-size responses match latitudinal-  
652 size clines in arthropods, revealing critical differences between aquatic and  
653 terrestrial species. *Ecology Letters*, **18**, 327-335.
- 654 Horne, C.R., Hirst, A.G. & Atkinson, D. (2017) Seasonal body size reductions with warming  
655 covary with major body size gradients in arthropod species. *Proceedings of the Royal  
656 Society B: Biological Sciences*, **284**, 20170238.
- 657 Howard, J. & Gugger, S. (2020) Fastai: a layered API for deep learning. *Information*, **11**, 108.

- 658 Høye, T.T., Ärje, J., Bjerger, K., Hansen, O.L., Iosifidis, A., Leese, F., Mann, H.M., Meissner, K.,  
659 Melvad, C. & Raitoharju, J. (2021) Deep learning and computer vision will transform  
660 entomology. *Proceedings of the National Academy of Sciences*, **118**.
- 661 Hsiang, A.Y., Brombacher, A., Rillo, M.C., Mleneck-Vautravers, M.J., Conn, S., Lordsmith, S.,  
662 Jentzen, A., Henehan, M.J., Metcalfe, B. & Fenton, I.S. (2019) Endless Forams:>  
663 34,000 modern planktonic foraminiferal images for taxonomic training and  
664 automated species recognition using convolutional neural networks.  
665 *Paleoceanography and Paleoclimatology*, **34**, 1157-1177.
- 666 Hunter, J.D. (2007) Matplotlib: A 2D graphics environment. *Computing in Science &*  
667 *Engineering*, **9**, 90-95.
- 668 Johnson, K.G., Brooks, S.J., Fenberg, P.B., Glover, A.G., James, K.E., Lister, A.M., Michel, E.,  
669 Spencer, M., Todd, J.A. & Valsami-Jones, E. (2011) Climate change and biosphere  
670 response: unlocking the collections vault. *BioScience*, **61**, 147-153.
- 671 Kharouba, H.M., Lewthwaite, J.M., Guralnick, R., Kerr, J.T. & Vellend, M. (2019) Using insect  
672 natural history collections to study global change impacts: challenges and  
673 opportunities. *Philosophical Transactions of the Royal Society B*, **374**, 20170405.
- 674 Kingsolver, J.G., Arthur Woods, H., Buckley, L.B., Potter, K.A., MacLean, H.J. & Higgins, J.K.  
675 (2011) Complex life cycles and the responses of insects to climate change. Oxford  
676 University Press.
- 677 Lürig, M.D., Donoughe, S., Svensson, E.I., Porto, A. & Tsuboi, M. (2021) Computer vision,  
678 machine learning, and the promise of phenomics in ecology and evolutionary  
679 biology. *Frontiers in Ecology and Evolution*, **9**, 148.
- 680 MacLean, H.J., Kingsolver, J.G. & Buckley, L.B. (2016) Historical changes in thermoregulatory  
681 traits of alpine butterflies reveal complex ecological and evolutionary responses to  
682 recent climate change. *Climate Change Responses*, **3**, 1-10.
- 683 McAllister, C.A., McKain, M.R., Li, M., Bookout, B. & Kellogg, E.A. (2019) Specimen-based  
684 analysis of morphology and the environment in ecologically dominant grasses: the  
685 power of the herbarium. *Philosophical Transactions of the Royal Society B*, **374**,  
686 20170403.
- 687 Meineke, E.K., Davies, T.J., Daru, B.H. & Davis, C.C. (2019) Biological collections for  
688 understanding biodiversity in the Anthropocene. *Philosophical Transactions of the*  
689 *Royal Society B*, **374**, 20170386.
- 690 Mothra Team (2020): <https://gitlab.com/mothra/mothra-data>  
691 Mothra Team (2021): <https://github.com/machine-shop/mothra/>
- 692 Nelson, G. & Ellis, S. (2019) The history and impact of digitization and digital data  
693 mobilization on biodiversity research. *Philosophical Transactions of the Royal Society*  
694 *B*, **374**, 20170391.
- 695 Otsu, N. (1979) A threshold selection method from gray-level histograms. *IEEE transactions*  
696 *on systems, man, and cybernetics*, **9**, 62-66.
- 697 Paszke, A., Gross, S., Massa, F., Lerer, A., Bradbury, J., Chanan, G., Killeen, T., Lin, Z.,  
698 Gimelshein, N. & Antiga, L. (2019) Pytorch: An imperative style, high-performance  
699 deep learning library. *Advances in neural information processing systems*, **32**, 8026-  
700 8037.
- 701 Paterson, G., Albuquerque, S., Blagoderov, V., Brooks, S., Cafferty, S., Cane, E., Carter, V.,  
702 Chainey, J., Crowther, R. & Douglas, L. (2016) iCollections—Digitising the British and  
703 Irish Butterflies in the Natural History Museum, London. *Biodiversity Data Journal*, **4**,  
704 e9559.



- 705 Price, Benjamin W., & Fenberg, Phillip B. (2021). Results of Mothra analysis of all iCollections  
706 butterflies [Data set]. Zenodo. <https://doi.org/10.5281/zenodo.5759759>
- 707 Ronneberger, O., Fischer, P. & Brox, T. (2015) U-net: Convolutional networks for biomedical  
708 image segmentation. *International Conference on Medical image computing and*  
709 *computer-assisted intervention*, pp. 234-241. Springer.
- 710 Sheridan, J.A. & Bickford, D. (2011) Shrinking body size as an ecological response to climate  
711 change. *Nature Climate Change*, **1**, 401-406.
- 712 Smith, L.N. (2018) A disciplined approach to neural network hyper-parameters: Part 1--  
713 learning rate, batch size, momentum, and weight decay. *arXiv preprint*  
714 *arXiv:1803.09820*.
- 715 Suhling, F., Suhling, I. & Richter, O. (2015) Temperature response of growth of larval  
716 dragonflies—an overview. *International Journal of Odonatology*, **18**, 15-30.
- 717 Svoboda, E. (2020) Artificial intelligence is improving the detection of lung cancer. *Nature*,  
718 **587**, S20-S22.
- 719 Teder, T. (2014) Sexual size dimorphism requires a corresponding sex difference in  
720 development time: A meta-analysis in insects. *Functional Ecology*, **28**, 479-486.
- 721 Teder, T., Kaasik, A., Taits, K. & Tammaru, T. (2021) Why do males emerge before females?  
722 Sexual size dimorphism drives sexual bimaturism in insects. *Biological Reviews*.
- 723 Thomas, J. & Lewington, R. (2014) *The butterflies of Britain and Ireland*. Bloomsbury  
724 Publishing.
- 725 Tseng, M., Kaur, K.M., Soleimani Pari, S., Sarai, K., Chan, D., Yao, C.H., Porto, P., Toor, A.,  
726 Toor, H.S. & Fograscher, K. (2018) Decreases in beetle body size linked to climate  
727 change and warming temperatures. *Journal of Animal Ecology*, **87**, 647-659.
- 728 Van der Walt, S., Schönberger, J.L., Nunez-Iglesias, J., Boulogne, F., Warner, J.D., Yager, N.,  
729 Gouillart, E. & Yu, T. (2014) scikit-image: image processing in Python. *PeerJ*, **2**, e453.
- 730 Virtanen, P., Gommers, R., Oliphant, T.E., Haberland, M., Reddy, T., Cournapeau, D.,  
731 Burovski, E., Peterson, P., Weckesser, W. & Bright, J. (2020) SciPy 1.0: fundamental  
732 algorithms for scientific computing in Python. *Nature methods*, **17**, 261-272.
- 733 Wilson, R. (2021) Disentangling the effects of ecology and life history on ectothermic  
734 temperature-size responses. University of Southampton.
- 735 Wilson, R.J., Fenberg, P.B., Brooks, S.J., van der Walt, S., Feng, D., & Price, B.W.  
736 (2020). iCollections butterfly images selected for automated measurement.  
737 [Data set]. Zenodo. <https://doi.org/10.5281/zenodo.3732132>
- 738 Wilson, R.J., Brooks, S.J. & Fenberg, P.B. (2019) The influence of ecological and life history  
739 factors on ectothermic temperature–size responses: Analysis of three Lycaenidae  
740 butterflies (Lepidoptera). *Ecology and Evolution*, **9**, 10305-10316.
- 741 Wonglersak, R., Fenberg, P.B., Langdon, P.G., Brooks, S.J. & Price, B.W. (2020) Temperature-  
742 body size responses in insects: a case study of British Odonata. *Ecological*  
743 *Entomology*, **45**, 795-805.
- 744 Zhang, Z., Liu, Q. & Wang, Y. (2018) Road extraction by deep residual u-net. *IEEE Geoscience*  
745 *and Remote Sensing Letters*, **15**, 749-753
